# Supplementary material for: Utility Of POC Xpert HIV-1 Tests For Detection-Quantification Of Complex HIV Recombinants Using Dried Blood Spots From Kinshasa, D. R. Congo
Source: PubMed Central journal article supplement (PMC6450884; doi:10.1038/s41598-019-41963-y), 2019-04-05
Supplement: 41598_2019_41963_MOESM1_ESM.pdf [file 41598_2019_41963_MOESM1_ESM.pdf]

**UTILITY OF POC XPRT HIV-1 TESTS FOR DETECTION-QUANTIFICATION OF COMPLEX HIV RECOMBINANTS USING DRIED BLOOD SPOTS FROM KINSHASA, D.R.CONGO**

Marina Rubio-Garrido<sup>1</sup>, Adolphe Ndarabu<sup>2</sup>, Gabriel Reina\*<sup>3</sup>, David Barquín<sup>3</sup>, Mirian Fernández-Alonso<sup>3</sup>, Silvia Carlos<sup>4</sup> and África Holguín<sup>1</sup>.

<sup>1</sup> HIV-1 Molecular Epidemiology Laboratory, Microbiology and Parasitology Department, Hospital Ramón y Cajal-IRYCIS and CIBER-ESP, Madrid (28034), Spain.

<sup>2</sup> Monkole Hospital, Kinshasa, Democratic Republic of Congo.

<sup>3</sup> Microbiology Department, Clínica Universidad de Navarra. Navarra Institute for Health Research (IdiSNA). Institute of Tropical Health, Universidad de Navarra (ISTUN), Pamplona (31008), Spain.

<sup>4</sup> Department of Preventive Medicine and Public Health, Universidad de Navarra, Pamplona (31008), Spain. Navarra Institute for Health Research (IdiSNA). Institute of Culture and Society (ICS), Institute of Tropical Health, Universidad de Navarra (ISTUN), Pamplona (31008), Spain.

\* Correspondence: [gabi@unav.es](mailto:gabi@unav.es)

**Supplementary Table 1. Viraemia overestimation considering VL assays and HIV-1 variants defined by phy.** VL, viral load; phy, phylogenetic analysis; DBS, dried blood spot; CRF, circulating recombinant form; URF, unique recombinant form.

| VL in DBS                                              | Number of 78 DBS                                | HIV-1 variants                                                                                                    |
|--------------------------------------------------------|-------------------------------------------------|-------------------------------------------------------------------------------------------------------------------|
| Higher by Xpert VL                                     | 54 (69.2%)                                      | 2C, 2H, 1CRF05_DF, 1CRF11_cpx, 1CRF18_cpx,<br>1CRF25_cpx, 2CRF27_cpx, 1CR45_cpx,<br>26URF,<br>17 without sequence |
| Higher by Xpert VL (>0.5 log)                          | 11 total (14.1%)<br>11/54 overestimated (20.3%) | 1C, 2H, 1CRF11_cpx, 1CRF27_cpx, 5URF,<br>1 without sequence                                                       |
| Higher by Roche VL                                     | 23 (29.5%)                                      | 1H , 1J, 1CRF19_cpx, 2CR45_cpx, 15 URFs,<br>3 without sequence                                                    |
| Higher by Roche VL (>0.5 log)                          | 1 total (1.3%)<br>1/23 overestimated (4.3%)     | 1CRF45_cpx                                                                                                        |
| Total cases with >0.5 log VL differences across assays | 12 (15.4%)                                      | 1C, 2H, 1CRF11_cpx, 1CRF27_cpx,<br>1CRF45_cpx, 5URF,<br>1 without sequence                                        |
